# Supplementary material for: Mitochondria Transfer from Adipose Stem Cells Improves the Developmental Potential of Cryopreserved Oocytes
Source: MDPI journal article supplement (doi:10.3390/biom12071008), 2022-07-21
Supplement: s1 [file s1]

*Article*

# Mitochondria transfer from adipose stem cells improves the developmental potential of cryopreserved oocytes

**Sanath Udayanga Kankanam Gamage<sup>1\*</sup>, Shu Hashimoto<sup>2</sup>, Yuki Miyamoto<sup>1</sup>, Tatsuya Nakano<sup>3</sup>, Masaya Yamanaka<sup>3</sup>, Akiko Koike<sup>1</sup>, Manabu Sato<sup>3</sup>, Yoshiharu Morimoto<sup>1\*</sup>**

1. HORAC Grand Front Osaka Clinic, Osaka, Japan

2. Reproductive Science Institute, Graduate School of Medicine, Osaka Metropolitan University, Osaka, Japan

3. IVF Namba Clinic, Osaka, Japan

**Supplementary figure**

**A Fresh adipose stem cell isolation**

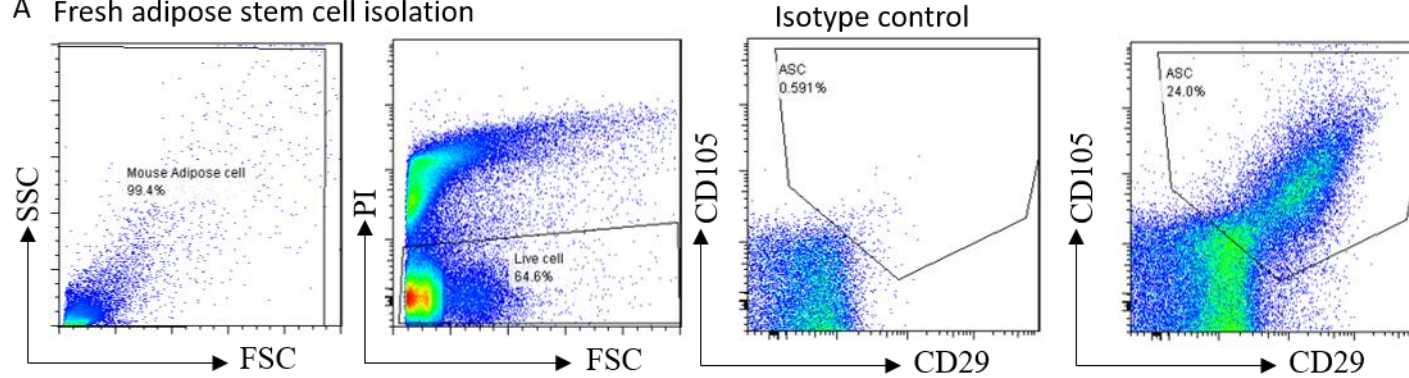

**B Fresh oogonial stem cell isolation**

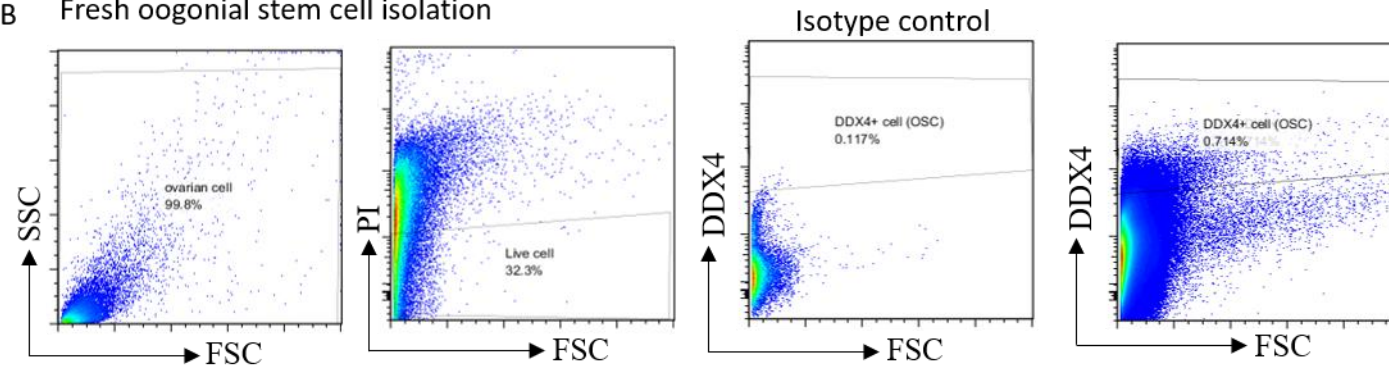

**Supplementary Figure S1. FACS plots for fresh adipose stem cell isolation and fresh oogonial stem cell isolation.** **A.** Fresh adipose stem cells were sorted by using FACS. The adipose cell was stained with isotype antibodies or target antibodies (CD105 & CD29) and propidium iodide (PI). ASC population was gated according to the isotype control staining in the PI negative population. **B.** Fresh oogonial stem cells (OSC) were sorted by using DDX4 antibody and isotype control antibody. OSC population was gated according to isotype control staining in PI negative cells.
